# Supplementary material for: Transcriptional inhibition after irradiation occurs preferentially at highly expressed genes in a manner dependent on cell cycle progression
Source: PubMed Central journal article supplement (PMC11469672; doi:10.7554/elife.94001), 2024-10-11

Figure 1-figure supplement 2 source data 2

A

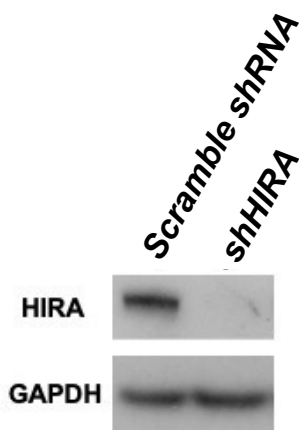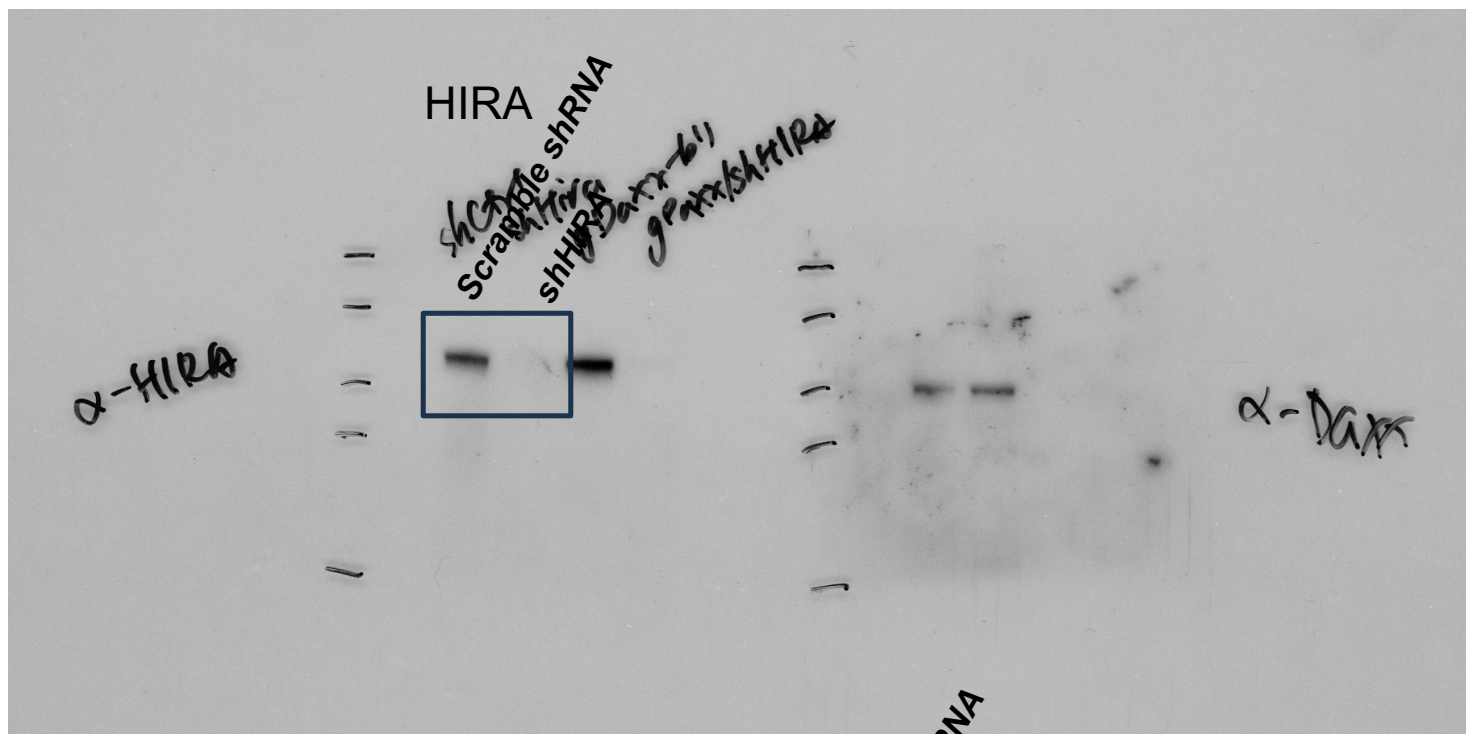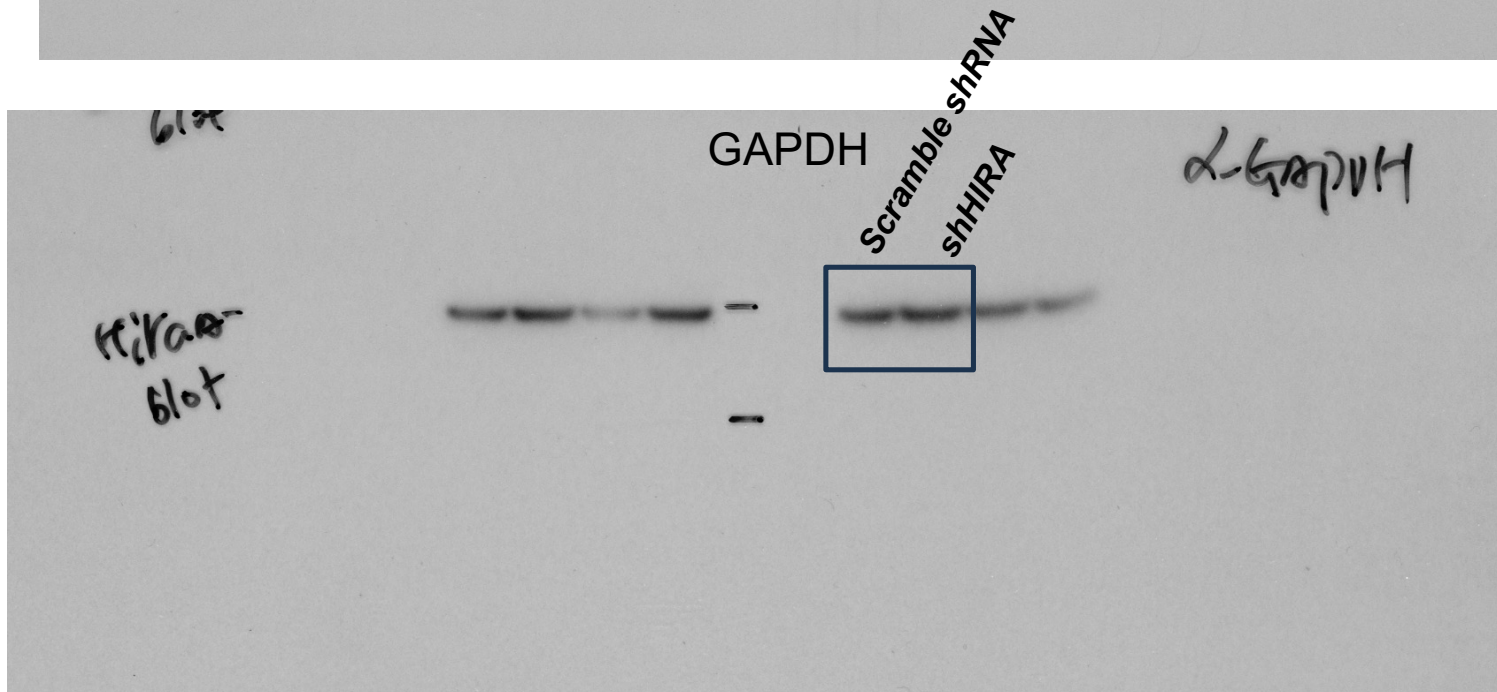

Supplement: elife-94001-fig1-figsupp2-data2.pdf [file elife-94001-fig1-figsupp2-data2.pdf]
