# Supplementary material for: Transcriptional inhibition after irradiation occurs preferentially at highly expressed genes in a manner dependent on cell cycle progression
Source: eLife journal article supplement (doi:10.7554/elife.94001), 2024-02-07

Figure 5-figure supplement 2 –source data 2

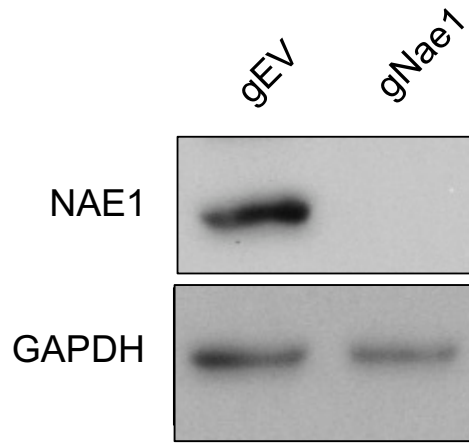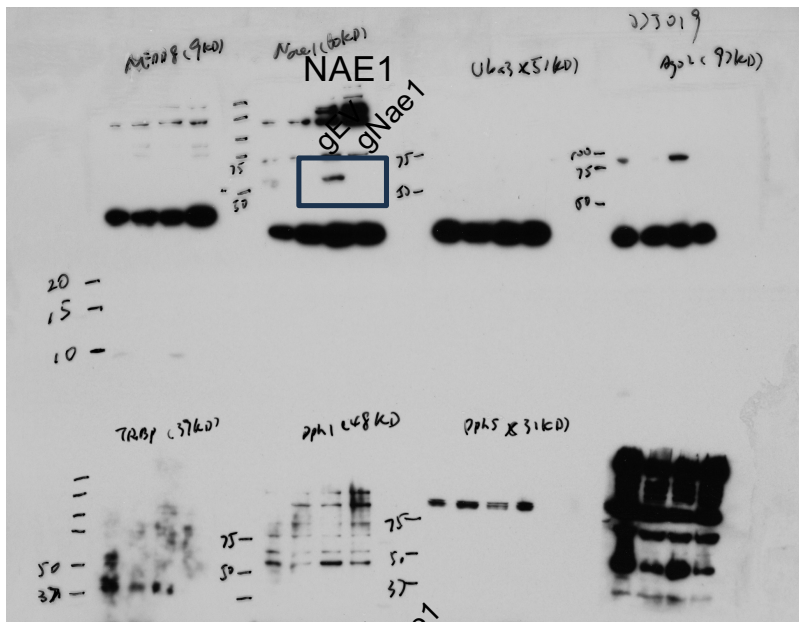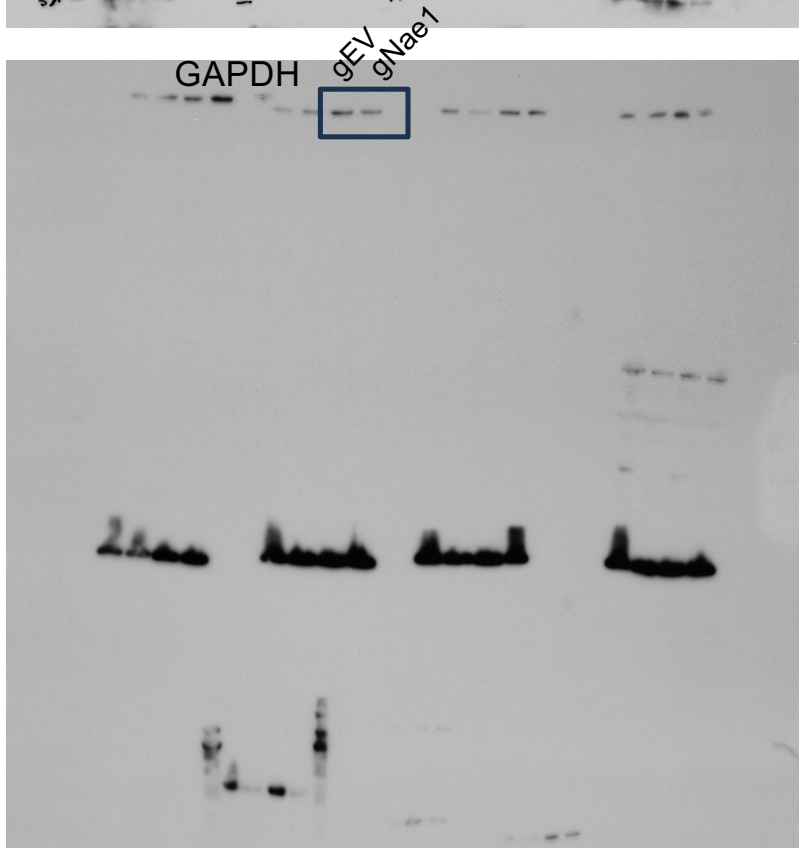

Supplement: fig5-figsupp2-data2 [file elife-94001-fig5-figsupp2-data2-v1.pdf]
